# Supplementary material for: CoDuSe group exercise programme improves balance and reduces falls in people with multiple sclerosis: A multi-centre, randomized, controlled pilot study
Source: PubMed Central journal article supplement — Mult Scler. 2016 Nov 12;23(10):1394–404. doi: 10.1177/1352458516677591 (PMC5564949; doi:10.1177/1352458516677591), 2016-11-12
Supplement: MSJ677591_Supplementary_Appendix.pdf [file MSJ677591_Supplementary_Appendix.pdf]

## Appendix 1

### Example on exercises and its progression

|                                                       | Position                                                     | Exercise                                                                                                       | Progression                                                                                              |
|-------------------------------------------------------|--------------------------------------------------------------|----------------------------------------------------------------------------------------------------------------|----------------------------------------------------------------------------------------------------------|
| <b>Core stability</b>                                 | Lie on your back with knees bent up, feet flat on the floor. | Slow movements of the arms.                                                                                    | Heel on the ground, slow movements of the arms.                                                          |
|                                                       | Lie on your back with knees bent up, feet flat on the floor. | Lift one foot off the floor and bring the knee over the hip so that the hip and knee are flexed to 90 degrees. | Slowly lift the second knee to 90 degrees, to the tabletop position.                                     |
|                                                       | 4-point kneeling                                             | Slide one foot in a straight line away from the body, then slide foot back to start position.                  | When the leg is straight lift the leg slowly off the floor, then lower and slide back to start position. |
|                                                       | Sitting position on a bobath-ball                            | Extend one leg.                                                                                                | Extend one leg while arms across the chest.                                                              |
| <b>Dual Task, maintaining core stability</b>          | Sitting position                                             | Move an item from one side to the other.                                                                       | Move an item from one side to the other without support from the feet.                                   |
|                                                       | From a sitting to a standing position                        | Rising up carrying a tray.                                                                                     | Rising up carrying a tray, with less support base.                                                       |
| <b>Sensory strategies, maintaining core stability</b> | Sitting position                                             | Sitting on a soft ground.                                                                                      | Sitting on a soft ground with eyes closed.                                                               |
|                                                       | Standing                                                     | Standing on a moving surface.                                                                                  | Standing on a moving surface while juggle with a balloon.                                                |
